# Supplementary material for: Sanpodo: a context-dependent activator and inhibitor of Notch signaling during asymmetric divisions
Source: Oxford University Press journal article supplement (doi:10.1242/dev.040386), 2009-11-11
Supplement: dev040386tables1.pdf [file dev040386tables1.pdf]

**Table S1. Overexpression of Notch or Fringe bypasses *spdo* function during the asymmetric division of MP2 to form vMP2 ('A' cell) and dMP2 ('B' cell)**

| Genotype                                                   | Asymmetric divisions<br>(vMP2, dMP2) % | Symmetric divisions<br>(dMP2, dMP2) % | Symmetric divisions<br>(vMP2, vMP2) % | <i>n</i> |
|------------------------------------------------------------|----------------------------------------|---------------------------------------|---------------------------------------|----------|
| Wild type                                                  | 100                                    | 0                                     | 0                                     | 200      |
| <i>spdo</i> <sup>G104</sup>                                | 1.3                                    | 98.7                                  | 0                                     | 234      |
| <i>o/e GFP; spdo</i> <sup>G104</sup>                       | 2.3                                    | 97.7                                  | 0                                     | 214      |
| <i>numb</i> <sup>2</sup>                                   | 0                                      | 0                                     | 100                                   | 200      |
| <i>o/e Spdo</i>                                            | 100                                    | 0                                     | 0                                     | 230      |
| <i>o/e Spdo; spdo</i> <sup>G104</sup>                      | 82.1                                   | 17.9                                  | 0                                     | 246      |
| <i>o/e Delta</i>                                           | 100                                    | 0                                     | 0                                     | 246      |
| <i>o/e Delta; spdo</i> <sup>G104</sup>                     | 1.8                                    | 98.2                                  | 0                                     | 224      |
| <i>o/e Delta, o/e Neur</i>                                 | 100                                    | 0                                     | 0                                     | 232      |
| <i>o/e Delta, o/e Neur;</i><br><i>spdo</i> <sup>G104</sup> | 11.4                                   | 88.1                                  | 0.4                                   | 236      |
| <i>o/e Notch</i>                                           | 85.1                                   | 1.1                                   | 13.7                                  | 450      |
| <i>o/e Notch; spdo</i> <sup>G104</sup>                     | 30.8                                   | 12.2                                  | 57.0                                  | 906      |
| <i>o/e Fringe</i>                                          | 99.7                                   | 0.3                                   | 0                                     | 308      |
| <i>o/e Fringe; spdo</i> <sup>G104</sup>                    | 47.5                                   | 42.9                                  | 9.6                                   | 774      |

ene overexpression mediated by *prospero-GAL4* via the GAL4/UAS system.

*n*, number of hemisegments scored.
