# Supplementary material for: Sanpodo: a context-dependent activator and inhibitor of Notch signaling during asymmetric divisions
Source: Oxford University Press journal article supplement (doi:10.1242/dev.040386), 2009-11-11
Supplement: dev040386tables2.pdf [file dev040386tables2.pdf]

**Table S2. Fringe or Notch overexpression bypasses *spdo* function in the U motoneuron lineage**

| Genotype                                                       | Average number of Eve <sup>+</sup> U neurons | Maximum number of Eve <sup>+</sup> U neurons | <i>n</i> |
|----------------------------------------------------------------|----------------------------------------------|----------------------------------------------|----------|
| Wild type                                                      | 4.94±0.1                                     | 6                                            | 7/109    |
| <i>o/e Spdo</i>                                                | 5.07±0.12                                    | 6                                            | 12/222   |
| <i>o/e Delta</i>                                               | 4.82±0.12                                    | 6                                            | 12/212   |
| <i>o/e Neur</i>                                                | 4.78±0.14                                    | 6                                            | 11/202   |
| <i>o/e Neur, Delta</i>                                         | 4.92±0.07                                    | 6                                            | 12/214   |
| <i>o/e Notch</i>                                               | 4.90±0.16                                    | 6                                            | 12/206   |
| <i>o/e Fringe</i>                                              | 4.95±0.05                                    | 6                                            | 12/208   |
| <i>spdo</i> <sup>-</sup>                                       | 0                                            | –                                            | 10/200   |
| <i>o/e GFP; spdo</i> <sup>-</sup>                              | 0                                            | –                                            | 11/238   |
| <i>o/e Spdo; spdo</i> <sup>-</sup>                             | 2.64±0.2                                     | 4                                            | 10/198   |
| <i>o/e Delta; spdo</i> <sup>-</sup>                            | 0.15±0.2                                     | 3                                            | 12/222   |
| <i>o/e Neur; spdo</i> <sup>-</sup>                             | 0                                            | –                                            | 6/108    |
| <i>o/e Neur, Dl; spdo</i> <sup>-</sup>                         | 0.68±0.43                                    | 5                                            | 12/216   |
| <i>o/e Notch; spdo</i> <sup>-</sup>                            | 2.82±1.0                                     | 8                                            | 17/332   |
| <i>o/e Notch; numb</i> <sup>2</sup> ; <i>spdo</i> <sup>-</sup> | 2.90±0.64                                    | 7                                            | 13/245   |
| <i>o/e Fringe; spdo</i> <sup>-</sup>                           | 0.68±0.45                                    | 6                                            | 17/295   |

Values indicate the average number of Eve<sup>+</sup> neurons per hemisegment ± s.d.

*n*, number of embryos scored/number of hemisegments scored.

*Spdo*<sup>-</sup> refers to embryos homozygous mutant for *spdo*<sup>G104</sup>.

Gene overexpression achieved through the use of *prospero-GAL4*.
